# Supplementary material
Source: ML conference proceedings conference paper supplement (https://openaccess.thecvf.com/content/WACV2021/html/Bethge_MeliusNet_An_Improved_WACV_2021_paper.html)

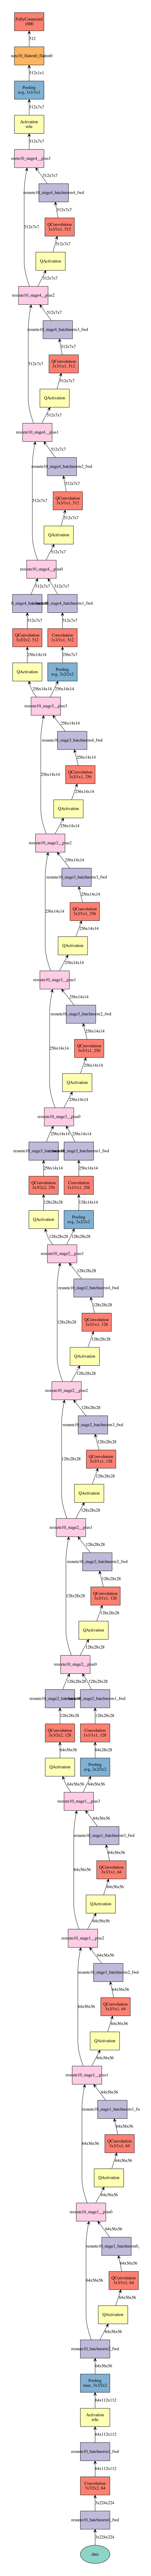

Supplement: Supplementary file 12 [file Bethge_MeliusNet_An_Improved_WACV_2021_supplemental.zip]

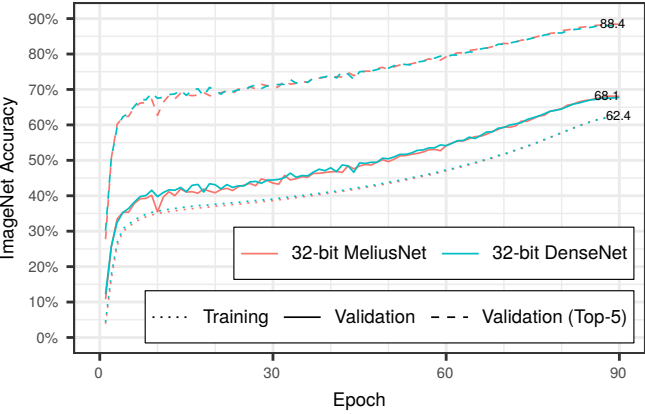

Supplement: Supplementary file 13 [file Bethge_MeliusNet_An_Improved_WACV_2021_supplemental.zip]

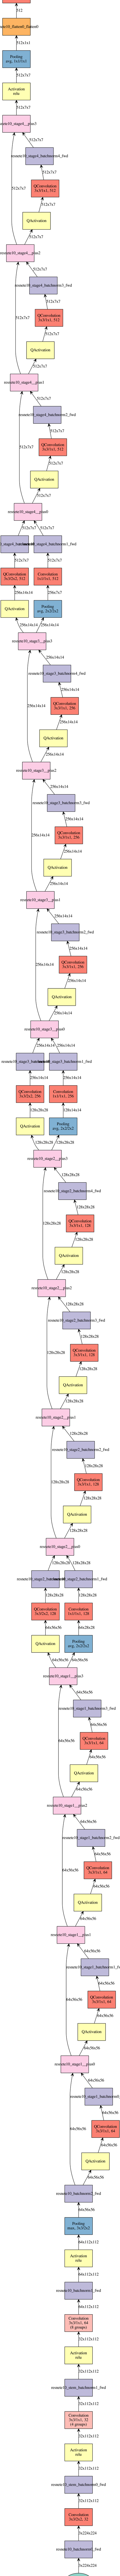

Supplement: Supplementary file 18 [file Bethge_MeliusNet_An_Improved_WACV_2021_supplemental.zip]
